# Supplementary material
Source: MDPI journal article supplement (https://www.mdpi.com/1424-2818/14/5/352)
Supplement: s1 [file s1]

Archive with 2 entries (2 files):
- Supplementary tables and figures/Supplementary figures.pdf
- Supplementary tables and figures/SuppTables_revised.pdf
